# Supplementary material
Source: PubMed Central journal article supplement (PMC3566299)
Supplement: NIHMS427397-supplement-ESI.pdf [file NIHMS427397-supplement-ESI.pdf]

**Quantitation of Ligand Effect in oxo-transfer reactions from dioxo-Mo(VI) trispyrazolyl borate  
complexes**

Partha Basu,<sup>a,\*</sup> Brian W. Kail,<sup>a</sup> Andrew K. Adams,<sup>a</sup> Victor N. Nemykin<sup>b</sup>

<sup>a</sup>Department of Chemistry and Biochemistry, Duquesne University, Pittsburgh, PA 15228.

<sup>b</sup>Department of Chemistry, University of Minnesota-Duluth, Duluth, MN 55812

basu@duq.edu

**Supporting Information.**

**Table S1.** Phosphine parameters used in this investigation.

| Phosphine                      | $\chi_d$ | $\Theta$ | $E_{ar}$ | $\pi_p$ |
|--------------------------------|----------|----------|----------|---------|
| PMe <sub>3</sub>               | 8.55     | 118      | 0        | 0       |
| PEt <sub>3</sub>               | 6.3      | 132      | 0        | 0       |
| P <sup>n</sup> Bu <sub>3</sub> | 5.25     | 136      | 0        | 0       |
| PPh <sub>3</sub>               | 13.25    | 145      | 2.7      | 0       |
| P(OMe) <sub>3</sub>            | 17.7     | 107      | 1        | 2.8     |
| PMePh <sub>2</sub>             | 12.6     | 136      | 2.2      | 0       |
| PEtPh <sub>2</sub>             | 11.1     | 140      | 2.3      | 0       |
| PMe <sub>2</sub> Ph            | 10.5     | 122      | 1        | 0       |
| PEt <sub>2</sub> Ph            | 8.6      | 136      | 1.1      | 0       |
| P(OEt) <sub>2</sub> Ph         | 15       | 121      | 1.7      | 1.9     |
| P(OMe) <sub>2</sub> Ph         | 16.4     | 120      | 1.7      | 1.9     |

**Table S2.** Phosphine oxide parameters used in this investigation.

| Phosphine oxide                | pK <sub>a</sub> | $\Theta$           | $E_{ar}$ | $\pi_p$ |
|--------------------------------|-----------------|--------------------|----------|---------|
| OPMe <sub>3</sub>              | 0.72            | 115.2              | 0        | 0       |
| OPMe <sub>2</sub> Ph           | -0.49           | 111.7              | 1        | 0       |
| OPEt <sub>3</sub>              | 0.72            | 113.5              | 0        | 0       |
| PEt <sub>2</sub> Ph            | -7.98           | 111.7 <sup>a</sup> | 1.1      | 0       |
| OPBu <sup>n</sup> <sub>3</sub> | 0.77            | 113.5 <sup>a</sup> | 0        | 0       |
| PMe Ph <sub>2</sub>            | -1.28           | 123                | 2.2      | 0       |
| PEtPh <sub>2</sub>             | -7.98           | 123 <sup>a</sup>   | 2.3      | 0       |

**Table S3:** Variable Temperature rate constants of the reaction of Tp<sup>Me2</sup>MoO<sub>2</sub>(SPh) with PEtPh<sub>2</sub> in acetonitrile ([Tp<sup>Me2</sup>MoO<sub>2</sub>(SPh)] ~ 3.16 μM).

| temp (°C) | k (M*sec) <sup>-1</sup> | k x10 <sup>5</sup> sec <sup>-1</sup> | lnk   | ln(kh/k <sub>b</sub> T) |
|-----------|-------------------------|--------------------------------------|-------|-------------------------|
| 14.5      | 0.0545                  | 17.2                                 | -8.67 | -38.09                  |
| 20        | 0.0752                  | 23.8                                 | -8.34 | -37.78                  |
| 26.5      | 0.126                   | 39.9                                 | -7.83 | -37.29                  |
| 31        | 0.210                   | 66.3                                 | -7.32 | -36.80                  |

lnA, 15.8 (±2.4); E<sub>a</sub>, 58.7 (±6.7) kJ/mol (R<sup>2</sup> = 98.9); ΔH<sup>‡</sup>, 59.0 (±5.1) kJ/mol; ΔS<sup>‡</sup>, -112.4 (±17.1) J\* mol<sup>-1</sup>\*K<sup>-1</sup> (R<sup>2</sup> = 99); ΔG<sup>‡</sup><sub>298</sub>, 92.5 kJ/mol.

**Table S4:** Variable Temperature rate constants of the reaction of Tp<sup>Me2</sup>MoO<sub>2</sub>(SPh) with PMe<sub>3</sub> in acetonitrile ([Tp<sup>Me2</sup>MoO<sub>2</sub>(SPh)] ~ 3.16 μM) (determined at 726 nm)

| temp (°C) | k (M*sec) <sup>-1</sup> | k x10 <sup>5</sup> sec <sup>-1</sup> | lnk   | ln(kh/k <sub>b</sub> T) |
|-----------|-------------------------|--------------------------------------|-------|-------------------------|
| 10.5      | 0.0744                  | 23.5                                 | -8.36 | -37.76                  |

|    |        |     |       |        |
|----|--------|-----|-------|--------|
| 20 | 0.3855 | 122 | -6.71 | -36.15 |
| 40 | 0.4828 | 152 | -6.49 | -35.99 |

$\ln A, 9.8 (\pm 11.5)$ ;  $E_a, 41.7 (\pm 28.2)$  kJ/mol ( $R^2 = 83$ );  $\Delta H^\ddagger, 39.2 (\pm 28.1)$  kJ/mol;  $\Delta S^\ddagger, -172.1 (\pm 94.9)$  J\* $\text{mol}^{-1}$ \* $\text{K}^{-1}$  ( $R^2 = 81$ );  $\Delta G^\ddagger_{298}, 92.53$  kJ/mol.

**Table S5:** Variable Temperature rate constants of the reaction of  $\text{Tp}^{\text{Me}_2}\text{MoO}_2(\text{OPh})$  with  $\text{PMe}_3$  in acetonitrile.

| temp ( $^\circ\text{C}$ ) | k ( $\text{M}^*\text{sec}^{-1}$ ) | k x $10^5(\text{sec}^{-1})$ | lnk    | ln(kh/k <sub>b</sub> T) |
|---------------------------|-----------------------------------|-----------------------------|--------|-------------------------|
| 4                         | 0.0039                            | 1.3                         | -11.26 | -40.64                  |
| 10                        | 0.0151                            | 5.1                         | -9.88  | -39.29                  |
| 18                        | 0.0342                            | 12.4                        | -9.00  | -38.43                  |
| 22.5                      | 0.0418                            | 15.1                        | -8.80  | -38.25                  |
| 27.5                      | 0.0386                            | 17.8                        | -8.63  | -38.10                  |

$\ln A, 22.03 (\pm 5.8)$ ;  $E_a, 75.8 (\pm 13.9)$  kJ/mol ( $R^2 = 95.3$ );  $\Delta H^\ddagger, 73.3 (\pm 13.9)$  kJ/mol;  $\Delta S^\ddagger, -70.25 (\pm 48.9)$  J\* $\text{mol}^{-1}$ \* $\text{K}^{-1}$  ( $R^2 = 95.0$ );  $\Delta G^\ddagger_{298}, 94.27$  kJ/mol.

**Table S6:** Variable Temperature rate constants of the reaction of  $\text{TpMe}_2\text{MoO}_2(\text{OPh})$  with  $\text{PMe}_2\text{Ph}$  in acetonitrile.

| temp ( $^\circ\text{C}$ ) | k ( $\text{M}^*\text{sec}^{-1}$ ) | k x $10^5(\text{sec}^{-1})$ | lnk   | ln(kh/k <sub>b</sub> T) |
|---------------------------|-----------------------------------|-----------------------------|-------|-------------------------|
| 6                         | 0.01448                           | 4.8                         | -9.94 | -39.33                  |
| 11.5                      | 0.02120                           | 7.1                         | -9.56 | -38.97                  |
| 17.9                      | 0.03969                           | 13.3                        | -8.93 | -38.36                  |
| 22                        | 0.06524                           | 20.5                        | -8.49 | -37.94                  |

$\ln A, 16.75 (\pm 1.9)$ ;  $E_a, 62.08 (\pm 4.6)$  kJ/mol ( $R^2 = 99.5$ );  $\Delta H^\ddagger, 59.9 (\pm 4.5)$  kJ/mol;  $\Delta S^\ddagger, -113.61 (\pm 15.6)$  J\* $\text{mol}^{-1}$ \* $\text{K}^{-1}$  ( $R^2 = 99.5$ );  $\Delta G^\ddagger_{298}, 93.57$  kJ/mol.

**Table S7:** Variable Temperature rate constants of the reaction of  $\text{Tp}^{\text{Me}_2}\text{MoO}_2(\text{OPh})$  with  $\text{PEt}_3$  in acetonitrile.

| temp ( $^\circ\text{C}$ ) | k ( $\text{M}^*\text{sec}^{-1}$ ) | k x $10^5\text{sec}^{-1}$ | lnk    | ln(kh/k <sub>b</sub> T) |
|---------------------------|-----------------------------------|---------------------------|--------|-------------------------|
| 7.5                       | 0.00747                           | 2.5                       | -10.58 | -39.98                  |
| 12                        | 0.00793                           | 2.7                       | -10.52 | -39.93                  |
| 17                        | 0.01588                           | 5.4                       | -9.83  | -39.26                  |
| 19                        | 0.02879                           | 9.8                       | -9.23  | -38.67                  |
| 23                        | 0.02746                           | 9.3                       | -9.28  | -38.73                  |

$\ln A, 18.9 (\pm 6.4)$ ;  $E_a, 69.16 (\pm 15.3)$  kJ/mol ( $R^2 = 93.4$ );  $\Delta H^\ddagger, 66.8 (\pm 15.1)$  kJ/mol;  $\Delta S^\ddagger, -95.3 (\pm 52.3)$  J\* $\text{mol}^{-1}$ \* $\text{K}^{-1}$  ( $R^2 = 93.1$ );  $\Delta G^\ddagger_{298}, 95.28$  kJ/mol.

**Table S8:** Variable Temperature rate constants of the reaction of  $\text{Tp}^{\text{Me}_2}\text{MoO}_2(\text{OPh})$  with  $\text{PEt}_2\text{Ph}$  in acetonitrile.

| temp (°C) | k $\text{M}^*\text{sec}^{-1}$ | k x $10^5\text{sec}^{-1}$ | lnk    | ln(kh/k <sub>b</sub> T) |
|-----------|-------------------------------|---------------------------|--------|-------------------------|
| 12.5      | 0.00583                       | 1.9                       | -10.85 | -28.96                  |
| 17.5      | 0.00863                       | 2.9                       | -10.46 | -28.55                  |
| 23.5      | 0.01517                       | 4.8                       | -9.95  | -28.02                  |
| 31        | 0.030501                      | 7.9                       | -9.44  | -27.48                  |

lnA, 12.5 ( $\pm 0.5$ ); E<sub>a</sub>, 55.50 ( $\pm 1.3$ ) kJ/mol (R<sup>2</sup> = 99.9); ΔH<sup>‡</sup>, 58.2 ( $\pm 1.2$ ) kJ/mol; ΔS<sup>‡</sup>, -36.9 ( $\pm 4.2$ ) J\* $\text{mol}^{-1}\text{K}^{-1}$  (R<sup>2</sup> = 99.9); ΔG<sup>‡</sup><sub>298</sub>, 69.23 kJ/mol.

**Table S9:** Variable Temperature rate constants of the reaction of  $\text{Tp}^{\text{Me}_2}\text{MoO}_2(\text{OPh})$  with  $\text{PMePh}_2$  in acetonitrile.

| temp (°C) | k ( $\text{M}^*\text{sec}^{-1}$ ) | k x $10^5(\text{sec}^{-1})$ | lnk    | ln(kh/k <sub>b</sub> T) |
|-----------|-----------------------------------|-----------------------------|--------|-------------------------|
| 10        | 0.0039                            | 1.29                        | -11.26 | -29.37                  |
| 16        | 0.0055                            | 1.82                        | -10.91 | -29.01                  |
| 22        | 0.0101                            | 3.17                        | -10.36 | -28.43                  |
| 27        | 0.0143                            | 4.75                        | -9.96  | -28.01                  |
| 31        | 0.0147                            | 4.86                        | -9.93  | -27.97                  |

lnA, 9.71 ( $\pm 1.9$ ); E<sub>a</sub>, 49.4 ( $\pm 4.7$ ) kJ/mol (R<sup>2</sup> = 98.7); ΔH<sup>‡</sup>, 51.9 ( $\pm 4.8$ ) kJ/mol; ΔS<sup>‡</sup>, -60.8 ( $\pm 16.4$ ) J\* $\text{mol}^{-1}\text{K}^{-1}$  (R<sup>2</sup> = 98.7); ΔG<sup>‡</sup><sub>298</sub>, 70.09 kJ/mol.

**Table S10.** Variable Temperature rate constants of the reaction of  $\text{Tp}^{\text{Me}_2}\text{MoO}_2(\text{OPh})$  with  $\text{PEtPh}_2$  in acetonitrile.

| temp (°C) | k ( $\text{M}^*\text{sec}^{-1}$ ) | k x $10^5(\text{sec}^{-1})$ | lnk    | ln(kh/k <sub>b</sub> T) |
|-----------|-----------------------------------|-----------------------------|--------|-------------------------|
| 10        | 0.0013                            | 0.43                        | -12.35 | -30.47                  |
| 16        | 0.00193                           | 0.65                        | -11.94 | -30.04                  |
| 26        | 0.00364                           | 1.24                        | -11.30 | -29.36                  |
| 31        | 0.0064                            | 2.12                        | -10.76 | -28.80                  |

lnA, 9.9 ( $\pm 1.8$ ); E<sub>a</sub>, 52.4 ( $\pm 4.4$ ) kJ/mol (R<sup>2</sup> = 99.3); ΔH<sup>‡</sup>, 55.2 ( $\pm 4.5$ ) kJ/mol; ΔS<sup>‡</sup>, -58.6 ( $\pm 15.2$ ) J\* $\text{mol}^{-1}\text{K}^{-1}$  (R<sup>2</sup> = 99.3); ΔG<sup>‡</sup><sub>298</sub>, 72.69 kJ/mol.

**Table S11.** Variable Temperature rate constants for the solvation reaction of  $\text{Tp}^{\text{Me}_2}\text{MoOCl}(\text{OPMe}_3)$  to  $\text{Tp}^{\text{Me}_2}\text{MoOCl}(\text{NCMe})$

| T (°C) | k·10 <sup>5</sup> (sec <sup>-1</sup> ) | lnk    | ln(kh/k <sub>b</sub> T) |
|--------|----------------------------------------|--------|-------------------------|
| 20     | 4.12                                   | -10.10 | -39.54                  |
| 26     | 8.33                                   | -9.39  | -38.85                  |
| 32     | 17.00                                  | -8.68  | -38.16                  |
| 37     | 31.30                                  | -8.069 | -37.57                  |

$\ln A$ , 26.9 ( $\pm 0.54$ );  $E_a$ , 90.1 ( $\pm 1.3$ ) kJ/mol ( $R^2=99.9$ );  $\Delta H^\ddagger$ , 87.4 ( $\pm 1.2$ ) kJ/mol;  $\Delta S^\ddagger$ , -30.6 ( $\pm 4.0$ ) J\* $\text{mol}^{-1}$ \* $\text{K}^{-1}$  ( $R^2=99.9$ );  $\Delta G^\ddagger_{298}$ , 96.6 kJ/mol.

**Table S12.** Variable Temperature rate constants for the solvation reaction of  $\text{Tp}^{\text{Me}_2}\text{MoOCl(OPMe}_2\text{Ph)}$  to  $\text{Tp}^{\text{Me}_2}\text{MoOCl(NCMe)}$ .

| T (°C) | $k \cdot 10^5$ ( $\text{sec}^{-1}$ ) | $\ln k$ | $\ln(kh/k_bT)$ |
|--------|--------------------------------------|---------|----------------|
| 9      | 3.30                                 | -10.32  | -39.72         |
| 16     | 8.04                                 | -9.43   | -38.86         |
| 21     | 18.0                                 | -8.62   | -38.08         |
| 32     | 54.9                                 | -7.51   | -36.99         |

$\ln A$ , 27.4 ( $\pm 2.0$ );  $E_a$ , 88.4 ( $\pm 4.8$ ) kJ/mol ( $R^2 = 99.7$ );  $\Delta H^\ddagger$ , 88.9 ( $\pm 4.5$ ) kJ/mol;  $\Delta S^\ddagger$ , -25.6 ( $\pm 15.6$ ) J\* $\text{mol}^{-1}$ \* $\text{K}^{-1}$  ( $R^2 = 99.7$ );  $\Delta G^\ddagger_{298}$ , 96.5 kJ/mol.

**Table S13.** Variable Temperature rate constants for the solvation reaction of  $\text{Tp}^{\text{Me}_2}\text{MoOCl(OPEt}_3)$  to  $\text{Tp}^{\text{Me}_2}\text{MoOCl(NCMe)}$ .

| T (°C) | $k \cdot 10^5$ ( $\text{sec}^{-1}$ ) | $\ln k$ | $\ln(kh/k_bT)$ |
|--------|--------------------------------------|---------|----------------|
| 9      | 2.24                                 | -10.71  | -40.11         |
| 16     | 6.52                                 | -9.638  | -39.06         |
| 21     | 12.1                                 | -9.021  | -38.46         |
| 32     | 33.6                                 | -7.99   | -37.48         |

$\ln A$ , 25.0 ( $\pm 2.6$ );  $E_a$ , 84.0 ( $\pm 6.3$ ) kJ/mol ( $R^2 = 99.4$ );  $\Delta H^\ddagger$ , 81.13 ( $\pm 6.6$ ) kJ/mol;  $\Delta S^\ddagger$ , -44.7 ( $\pm 22.5$ ) J\* $\text{mol}^{-1}$ \* $\text{K}^{-1}$  ( $R^2 = 99.3$ );  $\Delta G^\ddagger_{298}$ , 94.5 kJ/mol.

**Table S14.** Variable Temperature rate constants for the solvation reaction of  $\text{Tp}^{\text{Me}_2}\text{MoOCl(OPEt}_2\text{Ph)}$  to  $\text{Tp}^{\text{Me}_2}\text{MoOCl(NCMe)}$ .

| T (°C) | T (1/K)  | $k \cdot 10^5$ ( $\text{sec}^{-1}$ ) | $\ln k$ | $\ln(kh/k_bT)$ |
|--------|----------|--------------------------------------|---------|----------------|
| 9      | 0.003544 | 10.2                                 | -9.19   | -38.60         |
| 16     | 0.003458 | 26.00                                | -8.25   | -37.68         |
| 21     | 0.0034   | 56.6                                 | -7.48   | -36.92         |
| 32     | 0.003277 | 190.3                                | -6.26   | -35.75         |

$\ln A$ , 29.9 ( $\pm 1.4$ );  $E_a$ , 91.77 ( $\pm 3.4$ ) kJ/mol ( $R^2 = 99.8$ );  $\Delta H^\ddagger$ , 89.3 ( $\pm 3.7$ ) kJ/mol;  $\Delta S^\ddagger$ , -4.0 ( $\pm 12.7$ ) J\* $\text{mol}^{-1}$ \* $\text{K}^{-1}$  ( $R^2 = 99.8$ );  $\Delta G^\ddagger_{298}$ , 91.8 kJ/mol.

**Table S15.** Variable Temperature rate constants for the solvation reaction  $\text{Tp}^{\text{Me}_2}\text{MoOCl}(\text{OPBu}^n_3)$  to  $\text{Tp}^{\text{Me}_2}\text{MoOCl}(\text{NCMe})$

| T (°C) | T (1/K)  | $k \cdot 10^5$ (sec <sup>-1</sup> ) | lnk   | ln(kh/k <sub>b</sub> T) |
|--------|----------|-------------------------------------|-------|-------------------------|
| 16     | 0.003458 | 6.60                                | -9.63 | -39.05                  |
| 21     | 0.0034   | 12.60                               | -8.98 | -38.42                  |
| 26     | 0.003343 | 18.50                               | -8.60 | -38.06                  |
| 32     | 0.003277 | 44.60                               | -7.72 | -37.20                  |

lnA, 25.7 (±3.0); E<sub>a</sub>, 84.9 (±7.3) kJ/mol (R<sup>2</sup> =99.3); ΔH<sup>‡</sup>, 82.9 (±7.3) kJ/mol; ΔS<sup>‡</sup>, -40.5 (±24.8) J\* $\text{mol}^{-1} \cdot \text{K}^{-1}$  (R<sup>2</sup> =99.2); ΔG<sup>‡</sup><sub>298</sub>, 94.23 kJ/mol.

**Table S16.** Variable Temperature rate constants for the solvation reaction  $\text{Tp}^{\text{Me}_2}\text{MoOCl}(\text{OPMePh}_2)$  to  $\text{Tp}^{\text{Me}_2}\text{MoOCl}(\text{NCMe})$ .

| T (°C) | $k \cdot 10^5$ (sec <sup>-1</sup> ) | lnk   | ln(kh/k <sub>b</sub> T) |
|--------|-------------------------------------|-------|-------------------------|
| 16     | 57.50                               | -7.46 | -36.89                  |
| 21     | 107.5                               | -6.84 | -36.28                  |
| 27     | 190.9                               | -6.26 | -35.73                  |
| 32     | 303.0                               | -5.80 | -35.28                  |

lnA,  
24.

0 (±1.2); E<sub>a</sub>, 75.6 (±3.1) kJ/mol (R<sup>2</sup> =99.8); ΔH<sup>‡</sup>, 73.1 (±3.3) kJ/mol; ΔS<sup>‡</sup>, -53.3 (±11.0) J\* $\text{mol}^{-1} \cdot \text{K}^{-1}$  (R<sup>2</sup> =99.8); ΔG<sup>‡</sup><sub>298</sub>, 98.06 kJ/mol.

**Table S17:** Variable Temperature rate constants for the solvation reaction  $\text{Tp}^{\text{Me}_2}\text{MoOCl}(\text{OPEtPh}_2)$  to  $\text{Tp}^{\text{Me}_2}\text{MoOCl}(\text{NCMe})$ .

| T (°C) | $k \cdot 10^5$ (sec <sup>-1</sup> ) | lnk   | ln(kh/k <sub>b</sub> T) |
|--------|-------------------------------------|-------|-------------------------|
| 16     | 117.3                               | -6.75 | -36.18                  |
| 21     | 237.6                               | -6.04 | -35.49                  |
| 27     | 416.1                               | -5.48 | -34.95                  |
| 32     | 693.4                               | -4.97 | -34.45                  |

lnA, 26.7 (±1.9); E<sub>a</sub>, 80.13 (±4.8) kJ/mol (R<sup>2</sup> = 99.6); ΔH<sup>‡</sup>, 80.1 (±4.8) kJ/mol; ΔS<sup>‡</sup>, -31.1 (±15.8) J\* $\text{mol}^{-1} \cdot \text{K}^{-1}$  (R<sup>2</sup> = 99.6); ΔG<sup>‡</sup><sub>298</sub>, 89.4 kJ/mol.

**Table S18.** Variable Temperature rate constants for the solvation reaction of  $\text{Tp}^{\text{Me}_2}\text{MoO}(\text{SPh})(\text{OPEtPh}_2)$  to  $\text{Tp}^{\text{Me}_2}\text{MoO}(\text{SPh})(\text{NCMe})$ .

| T (°C) | $k \cdot 10^5$ (sec <sup>-1</sup> ) | lnk   | ln(kh/k <sub>b</sub> T) |
|--------|-------------------------------------|-------|-------------------------|
| 14.5   | 151.4                               | -6.49 | -35.91                  |
| 20     | 332.1                               | -5.71 | -35.15                  |
| 26.5   | 754.2                               | -4.89 | -34.35                  |
| 31     | 1498.2                              | -4.20 | -33.68                  |

lnA, 35.3 (±1.2); E<sub>a</sub>, 99.6 (±2.9) kJ/mol (R<sup>2</sup> =99.9); ΔH<sup>‡</sup>, 97.0 (±2.8) kJ/mol; ΔS<sup>‡</sup>, 38.6 (±9.5) J\*mol<sup>-1</sup>\*K<sup>-1</sup> (R<sup>2</sup> =99.9); ΔG<sup>‡</sup><sub>298</sub>, 85.49 kJ/mol.

**Table S19.** Acetonitrile Dependence on the Solvation of  $\text{Tp}^{\text{Me}_2}\text{MoOCl}(\text{OPMe}_3)$  to  $\text{Tp}^{\text{Me}_2}\text{MoOCl}(\text{NCMe})$

| [ $\text{Tp}^{\text{Me}_2}\text{MoOCl}(\text{OPMe}_3)$ ] (M) | [MeCN] (M) | $k \cdot 10^5$ (M·sec) <sup>-1</sup> |
|--------------------------------------------------------------|------------|--------------------------------------|
| 0.003059                                                     | 0.2        | 5.82                                 |
| 0.00516                                                      | 3.8        | 13.67                                |
| 0.005736                                                     | 7.6        | 14.02                                |
| 0.004015                                                     | 11.42      | 21.67                                |
| 0.004971                                                     | 15.2       | 19.06                                |
| 0.00325                                                      | 17.1       | 23.04                                |
| 0.00516                                                      | 19.0       | 31.45                                |
